# Supplementary material for: Iron oxide nanotubes synthesized via template-based electrodeposition
Source: Royal Society of Chemistry journal article supplement (doi:10.1039/c3nr06924a), 2014-01-01
Supplement: c3nr06924a1.pdf [file c3nr06924a1.pdf]

## Supplemental Information

### Figure SI 1

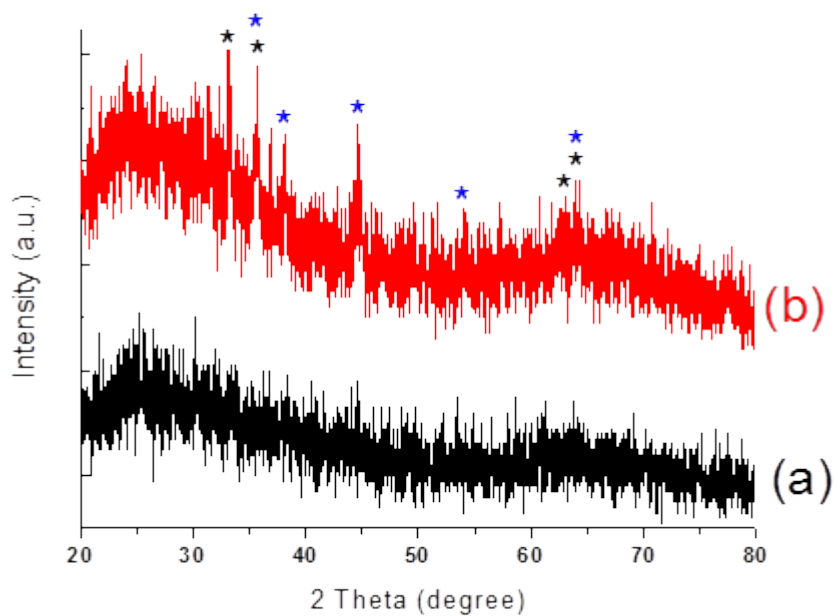

**Figure SI 1.** XRD results for alumina template (a) and Fe<sub>2</sub>O<sub>3</sub>-Fe<sub>3</sub>O<sub>4</sub> mixture nanostructures obtained after heat treatment at 325 °C in flowing H<sub>2</sub> gas (b). Black and blue asterisks indicate α-Fe<sub>2</sub>O<sub>3</sub> and Fe<sub>3</sub>O<sub>4</sub> structures, respectively.
